# Supplementary material
Source: PubMed Central journal article supplement (PMC3293119)
Supplement: jcbfm2011162x1.pdf [file jcbfm2011162x1.pdf]

# Appendix

## Notations:

Two notational conventions are introduced for the following calculations. For a labeling pool A,  $A$  denotes the fractional enrichment, i.e.:

$$A = \frac{{}^{13}A}{[A]}$$

Where  ${}^{13}A$  is the concentration of  ${}^{13}C$  labeled molecule A and  $[A]$  is the total concentration of molecules A, assumed to be constant in the metabolic steady-state assumption.

The temporal derivation of the concentration of  ${}^{13}C$  labeled molecule A is written as  $dA$ , i.e.:

$$dA = \frac{d{}^{13}A}{dt}$$

The composite fluxes  $V_{gt}^g$  and  $V_{gt}^n$  describing the turnover flux of the first labeled position of glutamate are defined as:

$$V_{gt}^g = \frac{V_x^g V_{tca}^g}{V_x^g + V_{tca}^g} \quad \text{and} \quad V_{gt}^n = \frac{V_x^n V_{tca}^n}{V_x^n + V_{tca}^n}$$

## A) TCA cycle and Glu/Gln cycle modeling

### Glial glutamate positions

The position 1 of glial acetyl-CoA is labeled as follows:

$$dAcCoA_1^g = V_{Ace} AcO^- - (V_{Ace} + V_{dil}^g) AcCoA_1^g \quad (1)$$

Where  $V_{dil}^g$  is the dilution flux from the metabolism of unlabeled pyruvate in the glial compartment. Working with the small pool approximation for glial acetyl-CoA (Uffmann and Gruetter 2007) ( $dAcCo_1^g \cong 0$  very fast compared with the large glutamate pool), we obtain the following relationship between the fractional enrichment of  $AcCo_1^g$  and plasma  $AcO^-$  :

$$AcCoA_1^g = \frac{V_{Ace}}{(V_{Ace} + V_{dil}^g)} AcO^- \equiv K_{dil} * AcO^- \quad (2)$$

$K_{dil}$  represents the affinity of glial cells to acetate as metabolic fuel. It was fixed to the value found with  ${}^{13}C$  nuclear magnetic resonance in a recent study (Duarte *et al*) in similar physiological conditions :

$$K_{dil} = 0.76$$

The position 5 of 2-oxoglutarate labels as follows:

$$dOG_5^g = V_{tca}^g K_{dil} AcO^- + V_x^g Glu_5^g - (V_x^g + V_{tca}^g) OG_5^g \quad (3)$$

For the position 1 of 2-oxoglutarate, the corresponding equation is:

$$dOG_1^g = \frac{V_{tca}^g}{2} OG_5^g + V_x^g Glu_1^g - (V_x^g + V_{tca}^g) OG_1^g \quad (4)$$

The factor  $\frac{V_{tca}^g}{2}$  is due to the fact that half of the label is flowing from  $OG_5^g$  to  $CO_2$ . The effective flux from  $OG_5^g$  to  $OG_1^g$  is  $\frac{V_{tca}^g}{2}$  (see Figure 2A).

The labeling of glial glutamate at the positions 1 and 5 is given by:

$$dGlu_{1,5}^g = V_x^g OG_{1,5}^g + V_{nt} Glu_{1,5}^n - (V_x^g + V_{nt}) Glu_{1,5}^g \quad (5)$$

Replacing the isolated  $OG_5^g$  from (5) in (3):

$$\begin{aligned} dGlu_5^g + \frac{V_x^g}{V_x^g + V_{tca}^g} dOG_5^g \\ = \frac{V_{tca}^g V_x^g}{V_x^g + V_{tca}^g} K_{dil} AcO^- + \frac{V_x^{g2}}{V_x^g + V_{tca}^g} Glu_5^g + V_{nt} Glu_5^n - (V_x^g + V_{nt}) Glu_5^g \end{aligned} \quad (6)$$

Similarly, we replace the isolated  $OG_1^g$  from (5) and  $OG_5^g$  from (5) in (4):

$$\begin{aligned} dOG_1^g = \frac{V_{tca}^g}{2} \frac{1}{V_x^g} (dGlu_5^g - V_{nt} Glu_5^n + (V_x^g + V_{nt}^g) Glu_5^g) \\ + V_x^g Glu_1^g - (V_x^g + V_{tca}^g) \frac{1}{V_x^g} (dGlu_1^g - V_{nt} Glu_1^n + (V_x^g + V_{nt}) Glu_1^g) \end{aligned} \quad (7)$$

$dGlu_5^g$  isolated in equation (6) is replaced in equation (7), which becomes:

$$\begin{aligned} dGlu_1^g + \frac{V_x^g}{(V_x^g + V_{tca}^g)} dOG_1^g + \frac{V_x^g}{(V_x^g + V_{tca}^g)} \frac{V_{tca}^g}{2} \frac{V_x^g}{V_x^g + V_{tca}^g} dOG_5^g \\ = \frac{V_{tca}^g{}^2 V_x^g}{2 (V_x^g + V_{tca}^g)^2} K_{dil} AcO^- + \frac{V_{tca}^g V_x^{g2}}{2 (V_x^g + V_{tca}^g)^2} Glu_5^g + V_{nt} Glu_1^n - (V_{gt}^g + V_{nt}) Glu_1^g \end{aligned} \quad (8)$$

The differential of the labeling of the small intermediate pools of the TCA cycles was neglected (Uffmann and Gruetter 2007) compared with the differential of the labeling pools of glutamate ( $dOG_1^g, dOG_5^g \ll dGlu_1^g, dGlu_5^g$ ). Thus, the differential equations of labeling of the positions 5 and 1 of glutamate become:

$$dGlu_5^g = V_{gt}^g K_{dil} AcO^- + V_{nt} Glu_5^n - (V_{gt}^g + V_{nt}) Glu_5^g \quad (9)$$

and

$$dGlu_1^g = \frac{V_{tca}^g{}^2 V_x^g}{2 (V_x^g + V_{tca}^g)^2} K_{dil} AcO^- + \frac{V_{tca}^g V_x^{g2}}{2 (V_x^g + V_{tca}^g)^2} Glu_5^g + V_{nt} Glu_1^n - (V_{gt}^g + V_{nt}) Glu_1^g \quad (10)$$

### Glutamine positions

The labeling of the positions 5 and 1 of glutamine is given by:

$$dGln_{1,5}^g = V_{nt} Glu_{1,5}^g - V_{nt} Gln_{1,5} \quad (11)$$

### Neuronal glutamate positions

The differential equations of the positions 5 and 1 of the neuronal glutamate are obtained in the same way than for glial glutamate, except that no labeling coming from acetate is entering the neuronal TCA cycle:

$$dGlu_5^n = V_{nt} Gln_5 - (V_{gt}^n + V_{nt}) Glu_5^n \quad (12)$$

$$dGlu_1^n = \frac{V_{tca}^n V_x^{n2}}{2(V_x^n + V_{tca}^n)^2} Glu_5^n + V_{nt} Gln_1 - (V_{gt}^n + V_{nt}) Glu_1^n \quad (13)$$

## **B) CO<sub>2</sub> labeling**

CO<sub>2</sub> is labeled indirectly from  $AcO^-$ ,  $Glu_5^g$ ,  $Glu_1^g$ ,  $Glu_5^n$  and  $Glu_1^n$  (Figure 2A).

### Glial contributions

The input labeling coming from  $OG_5^g$  gives:

$$d^{11}CO_2 = \frac{V_{tca}^g}{2} OG_5^g \quad (14)$$

Again, with the assumption of small derivatives of the TCA intermediates compared with the other variables of the differential system, we can extract from equation (3):

$$(V_x^g + V_{tca}^g) OG_5^g = V_{tca}^g K_{dil} AcO^- + V_x^g Glu_5^g \quad (15)$$

Substituting then  $OG_5^g$  from equation (15) in equation (14) gives the indirect contribution of labeling of CO<sub>2</sub> from  $AcO^-$  and  $Glu_5^g$  through  $OG_5^g$ :

$$d^{11}CO_2 = \frac{V_{tca}^g}{2} \left[ \frac{V_{tca}^g}{V_x^g + V_{tca}^g} K_{dil} AcO^- + \frac{V_x^g}{V_x^g + V_{tca}^g} Glu_5^g \right] \quad (16)$$

The input labeling coming from  $OG_1^g$  gives:

$$d^{11}CO_2 = V_{tca}^g OG_1^g \quad (17)$$

Working similarly by isolating  $OG_1^g$  in equation (4), we get:

$$d^{11}CO_2 = \frac{V_{tca}^g}{V_x^g + V_{tca}^g} \left[ K_{dil} * \frac{V_{tca}^g}{2} \frac{V_{tca}^g}{V_x^g + V_{tca}^g} AcO^- + \frac{V_{tca}^g}{2} \frac{V_x^g}{V_x^g + V_{tca}^g} Glu_5^g + V_x^g Glu_1^g \right] \quad (18)$$

This is the indirect contribution of labeling of  $CO_2$  from  $AcO^-$ ,  $Glu_5^g$  and  $Glu_1^g$  through  $OG_1^g$ . Considering both glial labeling through  $OG_1^g$  and  $OG_5^g$  (16) and (18), we can collect the indirect fluxes coming from  $AcO^-$ ,  $Glu_5^g$  and  $Glu_1^g$ .

$$\text{From } AcO^-: K_{dil} \frac{V_{tca}^g}{2} \frac{V_{tca}^g}{\underbrace{V_x^g + V_{tca}^g}_{\substack{\text{dilution through} \\ \text{transmitochondrial} \\ \text{flux}}}} + K_{dil} \frac{V_{tca}^g}{2} \frac{V_{tca}^g}{\underbrace{V_x^g + V_{tca}^g}_{\substack{\text{double dilution through} \\ \text{transmitochondrial flux}}}} \frac{V_{tca}^g}{V_x^g + V_{tca}^g} \quad (19)$$

$$\text{From } Glu_5^g: \frac{V_{tca}^g}{2} \frac{V_x^g}{\underbrace{V_x^g + V_{tca}^g}_{\substack{\text{dilution in } OG_5^g}}} + \frac{V_{tca}^g}{2} \frac{V_x^g}{\underbrace{V_x^g + V_{tca}^g}_{\substack{\text{dilution in } OG_5^g}}} \frac{V_{tca}^g}{\underbrace{V_x^g + V_{tca}^g}_{\substack{\text{dilution in } OG_1^g}}} \quad (20)$$

$$\text{From } Glu_1^g: V_{tca}^g \frac{V_x^g}{\underbrace{V_x^g + V_{tca}^g}_{\substack{\text{dilution in } OG_1^g}}} = V_{gt}^g \quad (21)$$

#### Neuronal contributions

Using the same approach, we get for the indirect fluxes coming from  $Glu_5^n$  and  $Glu_1^n$ :

$$\text{From } Glu_5^n: \frac{V_x^n}{V_x^n + V_{tca}^n} + \frac{V_{tca}^n}{V_x^n + V_{tca}^n} \frac{V_x^n}{V_x^n + V_{tca}^n} \quad (22)$$

$$\text{From } Glu_1^n: V_x^n \frac{V_{tca}^n}{V_x^n + V_{tca}^n} = V_{gt}^n \quad (23)$$

#### Exchanges with $CO_2$ dissolved in blood:

Assuming high diffusivity of  $CO_2$  across the blood brain barrier, we obtain a typical  $CO_2$  input flux of  $20 \mu\text{mol/g/min}$  (see Methods). In first approximation, we assume that all the  $CO_2$  entering the blood brain barrier is unlabeled. Due to mass conservation at metabolic steady-state, the same  $CO_2$  flux is leaving the brain, in addition to the  $3 V_{tca}^g + 3 V_{tca}^n$  of  $CO_2$  produced by the brain metabolism. Labeling of  $CO_2$  is given by:

$$d^{11}CO_2 = V_1 AcO^- + V_2 Glu_5^g + V_3 Glu_1^g + V_4 Glu_5^n + V_5 Glu_1^n - (3 V_{tca}^g + 3 V_{tca}^n + V_{dil}) {}^{11}CO_2 \quad (24)$$

With  $V_1, V_2, V_3, V_4$  and  $V_5$  given by the expressions (19), (20), (21),(22) and (23), respectively and  $V_{dil} = 20 \mu\text{mol/g/min}$ .

## **References**

Duarte JM, Lanz B, Gruetter R Compartmentalized Cerebral Metabolism of [1,6-C]Glucose Determined by in vivo C NMR Spectroscopy at 14.1 T. *Frontiers in neuroenergetics* 3:3.

Uffmann K, Gruetter R (2007) Mathematical modeling of  $^{13}\text{C}$  label incorporation of the TCA cycle: the concept of composite precursor function. *Journal of neuroscience research* 85:3304-17.
